# Supplementary material for: On the effects of alternative optima in context-specific metabolic model predictions
Source: PLoS Comput Biol. 2017 May 30;13(5):e1005568. doi: 10.1371/journal.pcbi.1005568 (PMC5469500; doi:10.1371/journal.pcbi.1005568)
Supplement: S2 Table — Non-core reactions are ranked in descending order based on the frequency of the presence of these reactions among the alternative optimal networks generated by RegrExLAD. The networks are generated by sampling the alternative optima space of RegrEx with RegrExAOS and considering, for each sampled flux vector, that a reaction is present in the associated network if its absolute flux value is greater than 10−6. The reaction names and the metabolic subsystems to which each reaction belongs are also included. (XLSX) [file pcbi.1005568.s003.xlsx]

## Sheet: Sheet1
S2Table. Ranked list of AraCOREred reactions according to their frequency across the alternative optima space of the alternative networks generated by RegrExLAD.
Frequency in AO space	Rxn Idx	Rxn Name	Rxn SubSystem
1	1	photosystem II	light reactions
1	2	cytochrom b6f complex	light reactions
1	3	photosystem I	light reactions
1	4	ferredoxin-NADP reductase	light reactions
1	5	ATPase	light reactions
1	7	PGA kinase	Calvin-Benson cycle, glycolysis
1	8	GAP dehydrogenase	Calvin-Benson cycle
1	9	TP isomerase	Calvin-Benson cycle, glycolysis
1	10	FBP aldolase	Calvin-Benson cycle, glycolysis
1	19	G6P isomerase	starch synthesis
1	34	TP isomerase	sucrose synthesis, gluconeogenesis, glycolysis
1	35	FBP aldolase	sucrose synthesis, gluconeogenesis, glycolysis
1	39	G6P isomerase	sucrose synthesis, sucrose degradation, gluconeogenesis
1	42	S6P synthase	sucrose synthesis
1	43	S6P phosphorylase	sucrose synthesis
1	44	Suc synthase	sucrose degradation
1	46	Fructokinase	sucrose degradation
1	52	Mal dehydrogenase	gluconeogenesis
1	54	PEP carboxylase	gluconeogenesis
1	55	Enolase	gluconeogenesis, glycolysis
1	56	PGA mutase	gluconeogenesis, glycolysis
1	57	PGA kinase	gluconeogenesis, glycolysis
1	58	GAP dehydrogenase	gluconeogenesis, glycolysis
1	61	6-Phosphofructokinase	glycolysis
1	62	GAP dehydrogenase	glycolysis
1	63	PGA mutase	glycolysis
1	64	Enolase	glycolysis
1	80	Mal dehydrogenase	tricarboxylic acid cycle, glyoxylate cycle
1	81	NADH dehydrogenase (Q)	oxidative phosphorylation
1	82	Cytc reductase	oxidative phosphorylation
1	83	Cytc oxidase	oxidative phosphorylation
1	84	ATP synthase	oxidative phosphorylation
1	100	6PG dehydrogenase	pentose phosphate pathway
1	101	6PG dehydrogenase	pentose phosphate pathway
1	111	Pyr phosphate dikinase	pyruvate metabolism
1	113	Mal dehydrogenase	pyruvate metabolism
1	114	Mal dehydrogenase	pyruvate metabolism
1	115	Mal dehydrogenase	pyruvate metabolism
1	116	Mal dehydrogenase	pyruvate metabolism
1	117	Mal dehydrogenase	pyruvate metabolism
1	134	inorganic PPiase	pyrophosphate recycling
1	135	inorganic PPiase	pyrophosphate recycling
1	136	PPi-dep. Phosphofructokinase	pyrophosphate recycling
1	145	NO3 reductase	nitrate assimilation
1	146	NO3 reductase	nitrate assimilation
1	152	HCO3 dehydratase	carbon fixation
1	155	Ala transaminase	alanine synthesis
1	156	Ala transaminase	alanine synthesis
1	167	Asp aminotransferase	aspartate synthesis
1	169	Asp aminotransferase	aspartate synthesis
1	175	Glu synthase	glutamate synthesis
1	176	Glu dehydrogenase	glutamate synthesis
1	178	Glu synthase	glutamate synthesis
1	180	Glu dehydrogenase	glutamate synthesis
1	181	Glu dehydrogenase	glutamate synthesis
1	182	Glu dehydrogenase	glutamate degradation
1	184	GABA transaminase	glutamate degradation
1	185	GABA transaminase	glutamate degradation
1	257	P5C reductase	proline synthesis
1	258	Pro dehydrogenase	proline degradation
1	259	Pro dehydrogenase	proline degradation
1	298	adenylate kinase	nucleotide metabolism
1	319	Nucleotide transporter	transport
1	320	ADP/ATP carrier	transport
1	326	TP/Pi translocator	transport
1	327	TP/Pi translocator	transport
1	328	TP/Pi translocator	transport
1	329	PEP/Pi translocator	transport
1	332	G6P exporter	transport
1	339	Dicarboxylate transporter	transport
1	353	B0,+-type amino acid transporter 1	transport
1	363	P5C exporter	transport
1	371	O2 diffusion	transport
1	372	O2 diffusion	transport
1	374	CO2 diffusion	transport
1	376	H2O diffusion	transport
1	377	H2O diffusion	transport
1	380	NH4 diffusion	transport
1	384	Pyr diffusion	transport
1	385	Pyr diffusion	transport
1	389	OAA diffusion	transport
1	390	KG diffusion	transport
1	391	Ala diffusion	transport
1	392	Asp diffusion	transport
1	393	Glu diffusion	transport
1	398	Glu importer	transport
1	412	Import Photon	import
0,996815286624204	360	Pro uniporter	transport
0,995222929936306	354	B0,+-type amino acid transporter 1	transport
0,964968152866242	356	B0,+-type amino acid transporter 1	transport
0,964968152866242	359	Basic amino acid carriers	transport
0,952229299363057	358	Basic amino acid carriers	transport
0,952229299363057	400	His importer	transport
0,917197452229299	355	B0,+-type amino acid transporter 1	transport
0,917197452229299	361	Pro/Glu antiporter	transport
0,835987261146497	347	Di-/ri-carboxylate carrier	transport
0,832802547770701	346	Di-/ri-carboxylate carrier	transport
0,807324840764331	348	Di-/ri-carboxylate carrier	transport
0,789808917197452	345	Di-/ri-carboxylate carrier	transport
0,780254777070064	340	Di-/ri-carboxylate carrier	transport
0,777070063694268	343	Di-/ri-carboxylate carrier	transport
0,764331210191083	341	Di-/ri-carboxylate carrier	transport
0,756369426751592	351	Di-/ri-carboxylate carrier	transport
0,750000000000000	349	Di-/ri-carboxylate carrier	transport
0,748407643312102	336	Dicarboxylate carrier	transport
0,748407643312102	337	Dicarboxylate carrier	transport
0,748407643312102	342	Di-/ri-carboxylate carrier	transport
0,746815286624204	344	Di-/ri-carboxylate carrier	transport
0,745222929936306	350	Di-/ri-carboxylate carrier	transport
0,0828025477707006	53	PEP carboxylase	gluconeogenesis
0,0477707006369427	179	Glu synthase (FeS-Fd)	glutamate synthesis
0,0207006369426752	31	Hexokinase	starch degradation, sucrose degradation
0,0207006369426752	40	Phosphoglucomutase	sucrose synthesis, sucrose degradation
0,0207006369426752	60	6-Phosphofructokinase	glycolysis
0,0191082802547771	41	UDPG pyrophosphorylase	sucrose synthesis, sucrose degradation, pyrophosphate recycling
0,0191082802547771	45	Fructofuranosidase	sucrose degradation
0,0191082802547771	311	Nucleoside-diphosphate kinase	nucleotide metabolism
0,00636942675159236	20	Phosphoglucomutase	starch synthesis
0,00636942675159236	21	G1P adenylyltransferase	starch synthesis
0,00636942675159236	36	FBPase	sucrose synthesis, gluconeogenesis, glycolysis
0,00636942675159236	250	Glu kinase	proline synthesis
0,00636942675159236	253	GluSeA dehydrogenase	proline synthesis
0,00636942675159236	256	spontaneous	proline synthesis
0,00636942675159236	261	P5C dehydrogenase	proline degradation
0,00159235668789809	23	starch synthase	starch synthesis
0,00159235668789809	24	starch synthase	starch synthesis
0,00159235668789809	26	amylase	starch degradation
0,00159235668789809	30	disproportionating enzyme	starch degradation
0,00159235668789809	33	(starch) phosphorylase	starch degradation
0,00159235668789809	334	Mas exporter	transport
0	6	RuBisCO	Calvin-Benson cycle
0	11	FBPase	Calvin-Benson cycle, glycolysis
0	12	F6P transketolase	Calvin-Benson cycle, pentose phosphate pathway
0	13	SBP aldolase	Calvin-Benson cycle
0	14	SBPase	Calvin-Benson cycle
0	15	S7P transketolase	Calvin-Benson cycle, pentose phosphate pathway
0	16	Ru5P epimerase	Calvin-Benson cycle, pentose phosphate pathway
0	17	R5P isomerase	Calvin-Benson cycle, pentose phosphate pathway
0	18	Ru5P kinase	Calvin-Benson cycle
0	22	starch synthase	starch synthesis
0	25	amylase	starch degradation
0	27	disproportionating enzyme	starch degradation
0	28	disproportionating enzyme	starch degradation
0	29	disproportionating enzyme	starch degradation
0	32	(starch) phosphorylase	starch degradation
0	37	F6P kinase	sucrose synthesis
0	38	F26BP phosphorylase	sucrose synthesis
0	47	UDPG:G6P glucosyltransferase	trehalose synthesis
0	48	Tre phosphatase	trehalose synthesis
0	49	cellulose synthase	cellulose synthesis
0	50	cellulose synthase	cellulose synthesis
0	51	cellulose synthase	cellulose synthesis
0	59	GAP dehydrogenase	glycolysis
0	65	Pyr kinase	glycolysis
0	66	Pyr kinase	glycolysis
0	67	Pyr dehydrogenase	pyruvate decarboxylation
0	68	Pyr dehydrogenase	pyruvate decarboxylation
0	69	DHL acetyltransferase	pyruvate decarboxylation
0	70	DHL dehydrogenase	pyruvate decarboxylation, tricarboxylic acid cycle
0	71	Cit synthase	tricarboxylic acid cycle, glyoxylate cycle
0	72	Aconitase dehydration	tricarboxylic acid cycle, glyoxylate cycle
0	73	Aconitase hydration	tricarboxylic acid cycle, glyoxylate cycle
0	74	iCit dehydrogenase	tricarboxylic acid cycle
0	75	KG dehydrogenase	tricarboxylic acid cycle
0	76	DHL succinyltransferase	tricarboxylic acid cycle
0	77	SCA-CoA ligase	tricarboxylic acid cycle
0	78	SCA dehydrogenase (Q)	tricarboxylic acid cycle, oxidative phosphorylation
0	79	Fum hydratase	tricarboxylic acid cycle
0	85	RuBisCO	photorespiration
0	86	PGCA phosphorylase	photorespiration
0	87	GCA oxidase	photorespiration
0	88	Catalase	photorespiration
0	89	Glu:GLX aminotransferase	photorespiration, glycine synthesis
0	90	Gly dehydrogenase	photorespiration
0	91	Aminomethyltransferase	photorespiration
0	92	DHL dehydrogenase	photorespiration
0	93	Gly hydroxymethyltransferase	photorespiration
0	94	Ser:GLX aminotransferase	photorespiration, glycine synthesis
0	95	GCEA dehydrogenase	photorespiration
0	96	Mal dehydrogenase	photorespiration
0	97	GCEA kinase	photorespiration
0	98	G6P dehydrogenase	pentose phosphate pathway
0	99	6-Phosphogluconolactonase	pentose phosphate pathway
0	102	Transaldolase	pentose phosphate pathway
0	103	DAHP synthase	Shikimate pathway
0	104	DHQ synthase	Shikimate pathway
0	105	DHQ dehydratase	Shikimate pathway
0	106	SA dehydrogenase	Shikimate pathway
0	107	SA kinase	Shikimate pathway
0	108	EPSP synthase	Shikimate pathway
0	109	CHR synthase	Shikimate pathway
0	110	R5P diphosphokinase	PRPP synthesis
0	112	Mal dehydrogenase	pyruvate metabolism
0	118	Cit synthase	pyruvate metabolism
0	119	Cit synthase	pyruvate metabolism
0	120	Aconitase dehydration	pyruvate metabolism
0	121	Aconitase dehydration	pyruvate metabolism
0	122	Aconitase hydration	pyruvate metabolism
0	123	Aconitase hydration	pyruvate metabolism
0	124	iCit dehydrogenase	pyruvate metabolism
0	125	iCit dehydrogenase	pyruvate metabolism
0	126	iCit dehydrogenase	pyruvate metabolism
0	127	iCit dehydrogenase	pyruvate metabolism
0	128	iCit lyase	pyruvate metabolism
0	129	Mal synthase	pyruvate metabolism
0	130	ATP-Cit lyase	actyl-coenzyme A synthesis
0	131	A-CoA synthetase	actyl-coenzyme A synthesis
0	132	A-CoA carboxylase	fatty acid synthesis
0	133	M-CoA:ACP malonyltransferase	fatty acid synthesis
0	137	For dehydrogenase	THF recycling
0	138	For-THF ligase	THF recycling
0	139	Dihydrofolate reductase	THF recycling
0	140	Thioredoxin reductase	TRX recycling
0	141	ADN kinase	ADN salvage
0	142	ADN nucleosidase	ADN salvage
0	143	AD PRPP-transferase	ADN salvage
0	144	Ribokinase	ADN salvage
0	147	Fd-NO2 reductase	nitrate assimilation
0	148	ATP sulfurylase	sulfur assimilation
0	149	APS reductase	sulfur assimilation
0	150	GSSG reductase	sulfur assimilation
0	151	SO3 reductase	sulfur assimilation
0	153	HCO3 dehydratase	carbon fixation
0	154	Ala transaminase	alanine synthesis
0	157	A-Glu kinase	arginine synthesis
0	158	A-GluP reductase	arginine synthesis
0	159	A-Orn transaminase	arginine synthesis
0	160	A-Orn:A-Glu acetyltransferase	arginine synthesis
0	161	CBP synthase	arginine synthesis, UMP synthesis
0	162	Orn carbamoyltransferase	arginine synthesis
0	163	Arg-SCA synthase	arginine synthesis
0	164	Arg-SCA lyase	arginine synthesis
0	165	Fum hydratase	arginine synthesis, IMP synthesis, AMP synthesis
0	166	Asn synthase	asparagine synthesis, lysine synthesis, methionine synthesis
0	168	Asp aminotransferase	aspartate synthesis
0	170	Asnase	aspartate synthesis
0	171	Ser O-acetyltransferase	cysteine synthesis
0	172	Ser O-acetyltransferase	cysteine synthesis
0	173	Cys synthase	cysteine synthesis
0	174	Cys synthase	cysteine synthesis
0	177	Glnase	glutamate synthesis
0	183	Glu decarboxylase	glutamate degradation
0	186	SCA-SeA dehydrogenase	glutamate degradation
0	187	Gln synthetase	glutamine synthesis
0	188	Gln synthetase	glutamine synthesis
0	189	Thr aldolase	glycine synthesis
0	190	ACD oxidoreductase	glycine synthesis
0	191	GCA oxidase	glycine synthesis
0	192	Catalase	glycine synthesis
0	193	Ser:GLX aminotransferase	glycine synthesis
0	194	GCEA dehydrogenase	glycine synthesis
0	195	Glu:GLX aminotransferase	glycine synthesis
0	196	ATP PR-transferase	histidine synthesis
0	197	Pr-ATP diphosphatase	histidine synthesis
0	198	Pr-AMP cyclohydrolase	histidine synthesis
0	199	P-AICAR-P isomerase	histidine synthesis
0	200	ImGP synthase	histidine synthesis
0	201	ImGP dehydratase	histidine synthesis
0	202	Hisol-P transaminase	histidine synthesis
0	203	Hisol-P phosphatase	histidine synthesis
0	204	Hisol-P dehydrogenase	histidine synthesis
0	205	Hisal-P dehydrogenase	histidine synthesis
0	206	Thr dehydratase	isoleucine synthesis
0	207	AL synthase	isoleucine synthesis, leucine synthesis, valine synthesis
0	208	AL synthase	isoleucine synthesis
0	209	Ketol-acid reductoisomerase	isoleucine synthesis
0	210	Ketol-acid reductoisomerase	isoleucine synthesis
0	211	DH-acid dehydratase	isoleucine synthesis
0	212	B.-chain-aa transaminase	isoleucine synthesis
0	213	AL synthase	leucine synthesis, valine synthesis
0	214	Ketol-acid reductoisomerase	leucine synthesis, valine synthesis
0	215	Ketol-acid reductoisomerase	leucine synthesis, valine synthesis
0	216	DH-acid dehydratase	leucine synthesis, valine synthesis
0	217	2-IPM synthase	leucine synthesis
0	218	3-IPM dehydratase	leucine synthesis
0	219	3-IPM dehydratase	leucine synthesis
0	220	3-IPM dehydrogenase	leucine synthesis
0	221	spontaneous	leucine synthesis
0	222	B.-chain-aa transaminase	leucine synthesis
0	223	Asp kinase	lysine synthesis, methionine synthesis, threonine synthesis
0	224	Asp-SeA dehydrogenase	lysine synthesis
0	225	DHD synthase	lysine synthesis
0	226	DHD reductase	lysine synthesis
0	227	DHD reductase	lysine synthesis
0	228	DAP aminotransferase	lysine synthesis
0	229	DAP epimerase	lysine synthesis
0	230	DAP decarboxylase	lysine synthesis
0	231	H-Ser dehydrogenase	methionine synthesis, threonine synthesis
0	232	H-Ser dehydrogenase	methionine synthesis, threonine synthesis
0	233	H-Ser kinase	methionine synthesis, threonine synthesis
0	234	CTH synthase	methionine synthesis
0	235	CTH beta-lyase	methionine synthesis
0	236	5M-THF oxidoreductase	methionine synthesis, THF recycling
0	237	Met synthase	methionine synthesis
0	238	Gly hydroxymethyltransferase	methionine synthesis, THF recycling
0	239	Met adenosyltransferase	methionine synthesis
0	240	H-Cys S-Met-transf.	methionine synthesis
0	241	aH-Cysase	methionine synthesis
0	242	CHR mutase	phenylalanine synthesis, tyrosine synthesis
0	243	Glu:PRE aminotransferase	phenylalanine synthesis, tyrosine synthesis
0	244	AGN dehydratase	phenylalanine synthesis
0	245	Arginase	proline synthesis
0	246	Urease	proline synthesis
0	247	Orn aminotransferase	proline synthesis
0	248	Glu kinase	proline synthesis
0	249	Glu kinase	proline synthesis
0	251	GluSeA dehydrogenase	proline synthesis
0	252	GluSeA dehydrogenase	proline synthesis
0	254	spontaneous	proline synthesis
0	255	spontaneous	proline synthesis
0	260	P5C dehydrogenase	proline degradation
0	262	P5C dehydrogenase	proline degradation
0	263	PGA dehydrogenase	serine synthesis
0	264	PSer aminotransferase	serine synthesis
0	265	PSer phosphatase	serine synthesis
0	266	Ser racemase	serine racemization
0	267	Threonine synthase	threonine synthesis
0	268	ANT synthase	tryptophan synthesis
0	269	ANT PR-transferase	tryptophan synthesis
0	270	PR-ANT isomerase	tryptophan synthesis
0	271	Ind-GP synthase	tryptophan synthesis
0	272	Ind-GP lyase	tryptophan synthesis
0	273	Trp synthase	tryptophan synthesis
0	274	AGN dehydrogenase	tyrosine synthesis
0	275	B.-chain-aa transaminase	valine synthesis
0	276	ATase	IMP synthesis
0	277	PRA-Gly ligase	IMP synthesis
0	278	GAR formyltransferase	IMP synthesis
0	279	FGAM synthase	IMP synthesis
0	280	FGAM cyclo-ligase	IMP synthesis
0	281	AIR carboxylase	IMP synthesis
0	282	SAICAR synthase	IMP synthesis
0	283	Adenylo-SCA lyase	IMP synthesis
0	284	AICAR formyltransferase	IMP synthesis
0	285	IMP cyclohydrolase	IMP synthesis
0	286	AMP deaminase	GMP synthesis
0	287	IMP dehydrogenase	GMP synthesis
0	288	GMP synthase	GMP synthesis
0	289	Adenylo-SCA synthase	AMP synthesis
0	290	Adenylo-SCA lyase	AMP synthesis
0	291	Asp carbamoyltransferase	UMP synthesis
0	292	DHOase	UMP synthesis
0	293	DHO dehydrogenase	UMP synthesis
0	294	ORO PR-transferase	UMP synthesis
0	295	OMP decarboxylase	UMP synthesis
0	296	CTP synthase	CTP synthesis
0	297	adenylate kinase	nucleotide metabolism
0	299	guanylate kinase	nucleotide metabolism
0	300	UMP/CMP kinase	nucleotide metabolism
0	301	Nucleoside-triphosphatase	nucleotide metabolism
0	302	Ribonucleoside-diphosphate reductase	nucleotide metabolism
0	303	Ribonucleoside-diphosphate reductase	nucleotide metabolism
0	304	Ribonucleoside-diphosphate reductase	nucleotide metabolism
0	305	Ribonucleoside-diphosphate reductase	nucleotide metabolism
0	306	Deoxyuridine-triphosphatase	nucleotide metabolism
0	307	Thymidylate synthase	nucleotide metabolism
0	308	Thymidine monophosphate kinase	nucleotide metabolism
0	309	Nucleoside-diphosphate kinase	nucleotide metabolism
0	310	Nucleoside-diphosphate kinase	nucleotide metabolism
0	312	Nucleoside-diphosphate kinase	nucleotide metabolism
0	313	Nucleoside-diphosphate kinase	nucleotide metabolism
0	314	Nucleoside-diphosphate kinase	nucleotide metabolism
0	315	Nucleoside-diphosphate kinase	nucleotide metabolism
0	316	Nucleoside-diphosphate kinase	nucleotide metabolism
0	317	SO4 diffusion	transport
0	318	NO2 transporter	transport
0	321	Brittle1 protein transporter	transport
0	322	Brittle1 protein transporter	transport
0	323	Brittle1 protein transporter	transport
0	324	NAD transporter	transport
0	325	NAD transporter	transport
0	330	GCA/GCEA shuffle	transport
0	331	GCA/GCEA shuffle	transport
0	333	Glc transporter	transport
0	335	Polyol transporter 5	transport
0	338	Dicarboxylate transporter	transport
0	352	SCA/Fum carrier	transport
0	357	B0,+-type amino acid transporter 1	transport
0	362	P5C exporter	transport
0	364	PRPP exporter	transport
0	365	Fum exporter	transport
0	366	H-Cys exporter	transport
0	367	ORO exporter	transport
0	368	DHO shuffle	transport
0	369	DHO shuffle	transport
0	370	Gly/Ser shuffle	transport
0	373	O2 diffusion	transport
0	375	CO2 diffusion	transport
0	378	H2O diffusion	transport
0	379	NH4 diffusion	transport
0	381	H2S diffusion	transport
0	382	AC diffusion	transport
0	383	Pyr diffusion	transport
0	386	GCA diffusion	transport
0	387	GCEA diffusion	transport
0	388	Mal diffusion	transport
0	394	Gly diffusion	transport
0	395	Ser diffusion	transport
0	396	Ala exporter	transport
0	397	Arg exporter	transport
0	399	His exporter	transport
0	401	Ile exporter	transport
0	402	Leu exporter	transport
0	403	Lys exporter	transport
0	404	Phe exporter	transport
0	405	Ser exporter	transport
0	406	Ser importer	transport
0	407	Thr exporter	transport
0	408	Trp exporter	transport
0	409	Tyr exporter	transport
0	410	Val exporter	transport
0	411	Proton sink/source for charge balancing of im-/export	im-/export
0	413	Import CO2	import
0	414	Import H2O	import
0	415	Import Pi	import
0	416	Import NO3	import
0	417	Import NH4	import
0	418	Import SO4	import
0	419	Import H2S	import
0	420	Export O2	export
0	421	Export Ala	export
0	422	Export Arg	export
0	423	Export Asn	export
0	424	Export Asp	export
0	425	Export Cys	export
0	426	Export Gln	export
0	427	Export Glu	export
0	428	Export Gly	export
0	429	Export His	export
0	430	Export Ile	export
0	431	Export Leu	export
0	432	Export lys	export
0	433	Export Met	export
0	434	Export Phe	export
0	435	Export Pro	export
0	436	Export Ser	export
0	437	Export Thr	export
0	438	Export Trp	export
0	439	Export Tyr	export
0	440	Export Val	export
0	441	Export glucose	export
0	442	Export fructose	export
0	443	Export sucrose	export
0	444	Export cell wall precursor	export
0	445	Export maltose	export
0	446	Export fatty acid precursor	export
0	447	Export signaling precursor	export
0	448	Maintenance	maintenance
0	449	Maintenance	maintenance
0	450	Maintenance	maintenance
0	451	Amino acid composition	biomass reaction
0	452	Carbon limiting biomass	biomass reaction
0	453	Nitrogen limiting biomass	biomass reaction
0	454	Light limiting biomass	biomass reaction
0	455	Malate Exchange	[]
